# Supplementary material for: Mesoporous TUD-1 supported indium oxide nanoparticles for epoxidation of styrene using molecular O2
Source: Royal Society of Chemistry journal article supplement (doi:10.1039/c5ra03400k), 2015-01-01

## Supporting Information

### Mesoporous TUD-1 Supported Indium Oxide Nanoparticles for Epoxidation of Styrene using Molecular O<sub>2</sub>

Sumbul Rahman,<sup>a</sup> S. A. Farooqui,<sup>b</sup> Aditya Rai,<sup>b</sup> Rawesh Kumar,<sup>a</sup> Chiranjit Santra,<sup>a</sup>  
Vinod C Prabhakaran,<sup>c</sup> Gopala Ram Bhadu,<sup>d</sup> Debasis Sen,<sup>e</sup> S. Mazumder,<sup>e</sup> Sudip Maity,<sup>f</sup>  
Anil Sinha\*<sup>b</sup> and Biswajit Chowdhury\*<sup>a</sup>

#### GC Analysis details (S1)

#### Column details and GC condition.

SE-30 Packed column, FID detector, Column length = 8 feet, Oven Temp. 210 °C, Injector  
and Detector Temp. 230 °C.

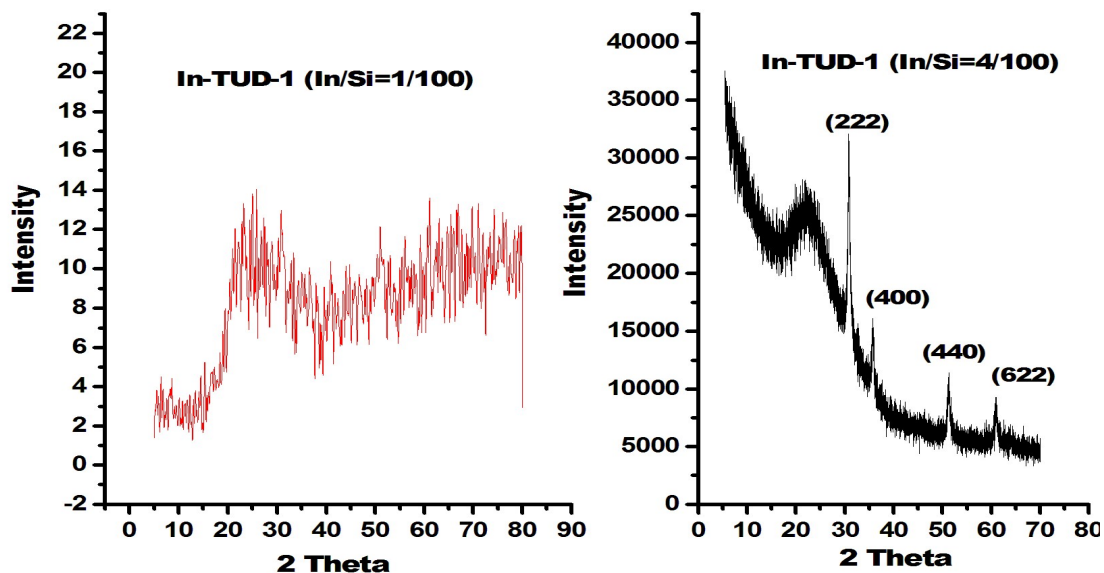

Fig. S2. Diffractograms of In-TUD-1 catalysts with two different loadings.

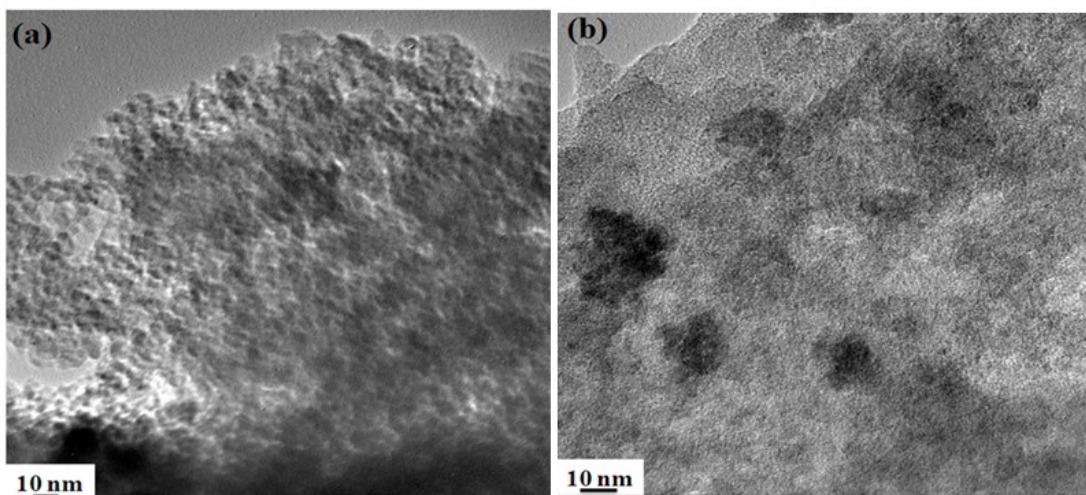

**Fig. S3** HRTEM images of In-TUD-1 (a) In/Si = 1/100 and (b) 4/100 catalysts.

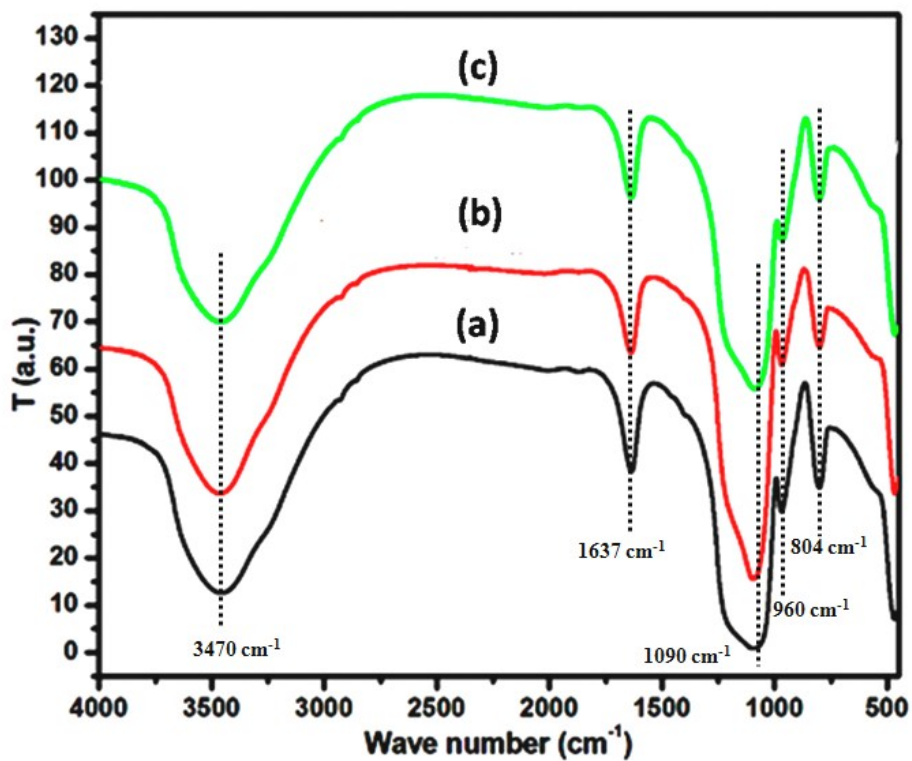

**Fig. S4** FTIR spectra of (a) TUD-1 (b) In-TUD-1 (In/Si = 1/100) (c) In-TUD-1 (In/Si = 4/100).

**Table S5.** Catalytic data for In-TUD-1 (In/Si = 1/100) catalyst for Styrene epoxidation reaction at different solvent.

| Catalyst | Solvent      | Conversion (%) | Selectivity (%) |              |
|----------|--------------|----------------|-----------------|--------------|
|          |              |                | Styrene Oxide   | Benzaldehyde |
| In-TUD-1 | DMF          | 24.7           | 57.0            | 42.9         |
| In-TUD-1 | 1-4 Dioxane  | -              | -               | -            |
| In-TUD-1 | Acetonitrile | -              | -               | -            |
| In-TUD-1 | Decane       | -              | -               | -            |

Reaction conditions: DMF, 10 mL; Styrene, 6.5 mmol; Dodecane, 0.1 mL; catalyst, 0.1 g; O<sub>2</sub> flow rate, 10 mL min<sup>-1</sup>, 130 °C; 8 h.

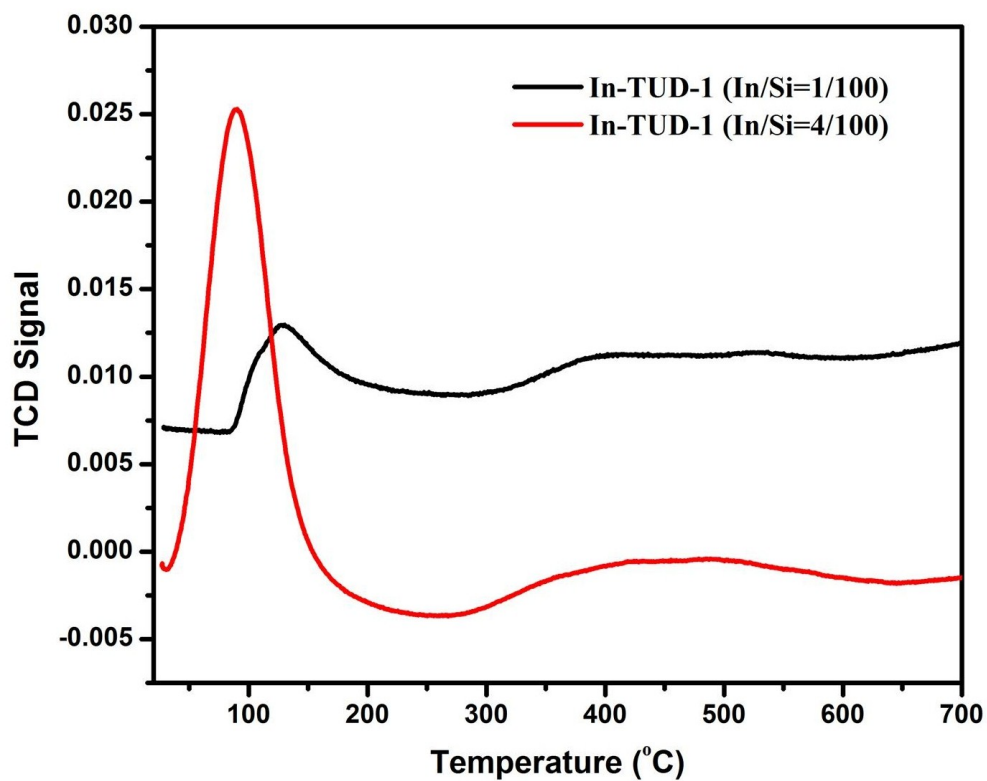

**Fig. S6.** Ammonia Temperature Programmed Desorption (TPD) profile.

**Table S7.** Order and rate constant determination.

| Order(n) | A                                                               | Rate constant(k) | R <sup>2</sup> |
|----------|-----------------------------------------------------------------|------------------|----------------|
| 0        | $(N_{styrene0} - N_{styrene})$                                  | 0.162            | 0.938          |
| 1        | $\ln \left( \frac{N_{styrene0}}{N_{styrene}} \right)$           | 0.027            | 0.951          |
|          | $\left( \frac{1}{N_{styrene}} - \frac{1}{N_{styrene0}} \right)$ | 0.004            | 0.961          |
| 2        |                                                                 |                  |                |

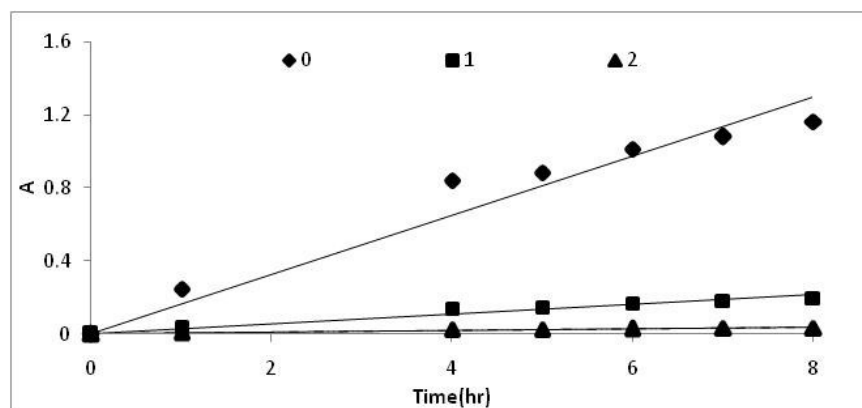**Fig. S8.** Plot of A vs. Time (h) for styrene oxidation reaction in a batch reactor.**Table S9.** Determination of ln k and 1/T for activation energy calculation.

| T(K)   | k(hr <sup>-1</sup> ) | ln k     | 1/T      |
|--------|----------------------|----------|----------|
| 343.15 | 0.014                | -4.2687  | 0.002914 |
| 363.15 | 0.019                | -3.96332 | 0.002754 |
| 383.15 | 0.022                | -3.81671 | 0.00261  |
| 403.15 | 0.027                | -3.61192 | 0.00248  |
| 423.15 | 0.032                | -3.44202 | 0.002363 |

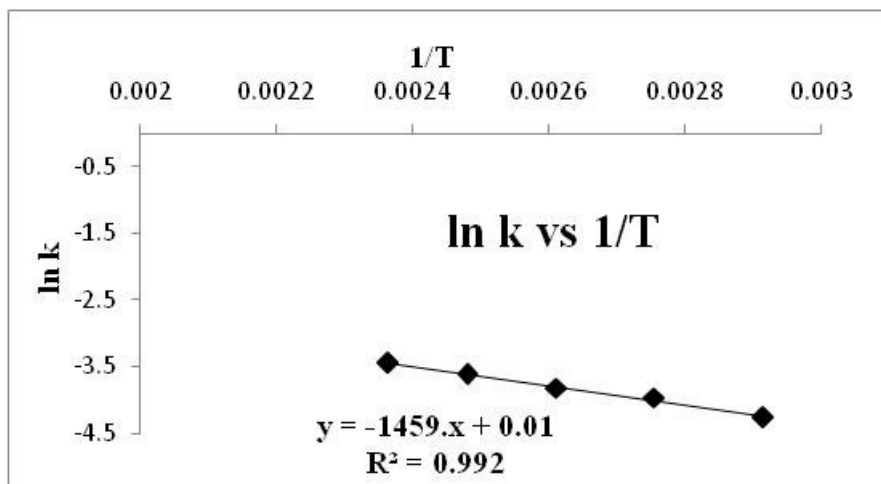

**Fig. S10** Plot of  $\ln k$  vs  $1/T$ . The slope ( $-E_a/R$ ) of equation of line is -1459. So, activation energy ( $E_a$ ) of reaction is 12.13 kJ/mol.

**Figure S11** The optimized structure for O<sub>2</sub> as adsorbate on SiO<sub>2</sub> surface with In<sub>2</sub>O<sub>3</sub> nanoparticle along with partial charges on the atoms of adsorbed oxygen (using UFF method).

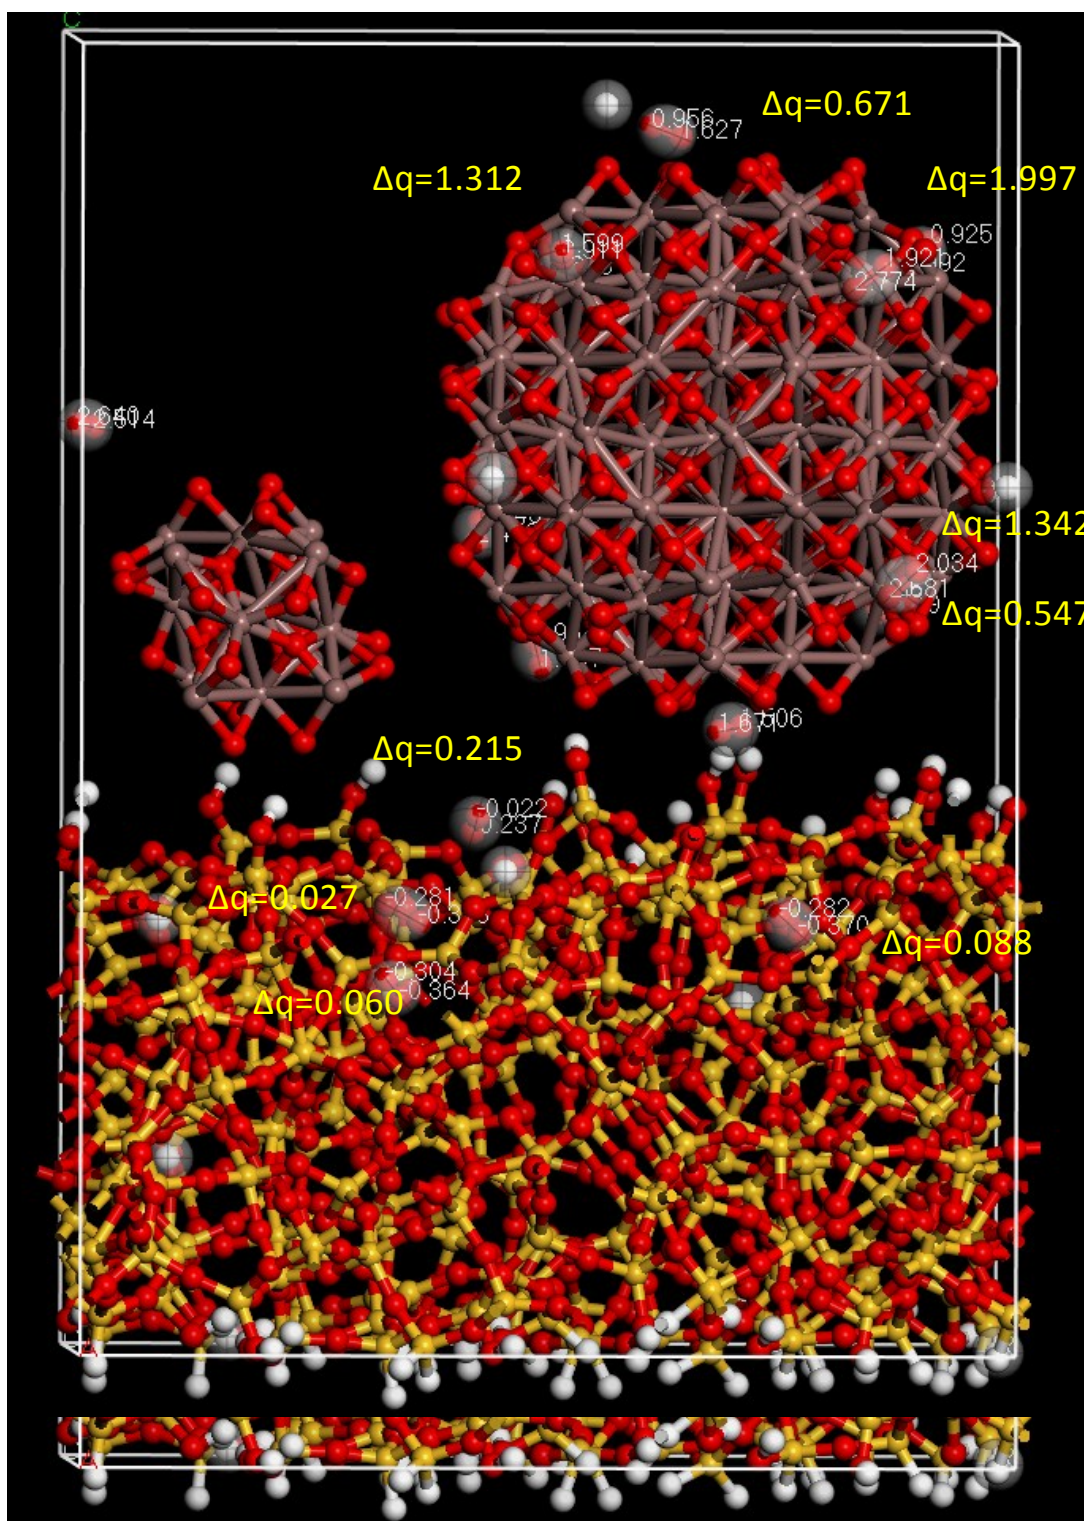

Supplement: c5ra03400k1.pdf [file c5ra03400k1.pdf]
